# Supplementary material for: Reduced global warming from CMIP6 projections when weighting models by performance and independence
Source: Copernicus journal article supplement (doi:10.5194/esd-2020-23), 2020-04-28
Supplement: Supplementary file [file esd-2020-23-AC2-supplement.zip]

## Reviewer 2

### Summary

Some models are more consistent with historical observations than others. In climate projection, it makes intuitive sense to give more weight to the models that are more consistent with observed climate shifts and less weight to models that are less consistent with observed climate shifts.

But how?

This paper reports on a method of assigning model weights that relies on two distinct distance measures: the distance of models from observations and the distance of models from other models. The method requires the specification of two parameters that determine how each of these distances are turned into model weights. The method for determining the parameter associated with inter-model distance is poorly explained (see specific comment 8 below). The method for determining the parameter associated with distance from observations is also poorly explained, but for many experiments, involves future-time-pseudo-observations from the future states that are the objective of the prediction (see comment 10 below). In other words, the tuning method appears to render the tests of the method to be of the “in-sample” variety. To weaken the degree of “in-sampleness” an additional test is performed using CMIP5 runs. However, since one expects many of the CMIP6 models to be closely related to the CMIP5 models, there are strong reasons to believe that this test is not truly “out-of-sample” either.

Even with the use of “future-time-pseudo-observations” in the tuning procedure, the improvements from this weighting scheme seem very modest in comparison with, for example, those obtained in Abramowitz and Bishop (2015, J. Climate) – (using a method that solely required historical observations for the weights). The revised paper should include some attempt to compare/contrast/explain the Abramowitz and Bishop results.

A superficially appealing feature of the method is that it gives more weight to models that are both skillful and statistically independent of other models. However, this independence is just described in terms of inter-model distance and not in terms of the independence of the model error. Is there some unstated proof that increased inter-model distance equates to increased model error independence? (It seems easy to think of counter examples). As demonstrated in Bishop and Abramowitz (2013), it is the independence of the error of the individual models comprising an ensemble forecast (as measured by inter-model forecast error correlation) that increases the predictive power of the ensemble. The revised paper needs to address the issue of the relationship or lack of relationship between inter-model distance and model error independence.

After applying the method to the CMIP6 ensemble members, the authors find reduced warming relative to the simple sample means of CMIP6 ensembles for the high and low CO<sub>2</sub> concentration scenarios considered. However, any confidence in this prediction must be strongly tempered by the “in sample” circular- nature of the testing and tuning procedures used by this method. My overall recommendation would be that the paper be returned to the authors to address the specific comments below and to include results from experiments in which only historical observations (or model-based-historical-pseudo-observations) were used to determine the weights. This constitutes major revision.

**We thank the reviewer for the critical assessment of our manuscript. The reviewer raises several important questions in the general comments above. Most of them we address in our answers to the specific comments as summarised below. In addition, we discuss the rationale behind our model independence metric in the following:**

- **Calculation of the independence shape parameter: see comment 8**
- **Calculation of the performance shape parameter: see comment 10**

- Out of sample skill tests: see comment 10
- Skill improvement and comparison with Abramowitz and Bishop (2015): see comment 11; in addition we have added several references to the approach used therein in the revised manuscript.
- Model distance versus model error independence: see below

We have attached the current draft of the manuscript. We refer to it as ‘revised manuscript’ in our answers. Note that this version of the manuscript might still be updated before the official re-submission.

### Model-model distance and model error correlation

The weighting method we apply in our study separates between a model's performance and independence. For establishing either measure, different metrics have been used in the past (see line 145 in the revised manuscript). In the case of independence, one could, for example, argue that it should be based on our knowledge of a model's inner workings (such as shared components, parameterizations or heritage with other models). However, this information is not always easily accessible and is, in addition, hard to quantify. Therefore, we here use an output-based definition of independence: given a generalised distance metric (based on the climatology of two variables) we define independence as a model distance to all other models in the ensemble. This is equivalent to the distance of the models' errors:

$$e_i - e_j = (m_i - obs) - (m_j - obs) = m_i - m_j$$

where  $e$  is the model error,  $m$  is the model, and  $obs$  the observation.

This approach has the advantage that it does not rely on observations, which are often geographically sparse and restricted in time. It, therefore, allows, in theory, establishing model independence based on hundreds of years of pre-industrial control runs or based on variables which do not have reliable global observations, such as precipitation.

Here we use surface air temperature and surface pressure as the basis for our estimate of independence. This follows the work of Merrifield et al. (2020), who show that using these two variables allow a clear separation of initial-condition members of the same model as well as closely related models on the one side and independent models on the other side (see, e.g., figure 5 in Merrifield et al., 2020). In addition, in our manuscript we show qualitative results of our independence classification as a model dependence tree in figure 5 and discuss several clusters where the “inner workings” are known (line 389-395 in the revised manuscript). As a further test we insert artificial new models into the ensemble (see figure 6 and related discussions). This allows us to investigate the change in independence weight based on the relation of the inserted model to the rest of the multi-model ensemble.

Bishop and Abramowitz (2013) follow a different approach that is based on the assumption that independent models have uncorrelated error time series. This approach can not directly be applied to our framework since we base our weighting on time-aggregated (mean, standard deviation, trend) spatially resolved fields. The main question the reviewer seems to pose, therefore is: Do the two approaches deliver fundamentally different results?

To test this we assume that the concept of error independence also holds for time-averaged spatial fields. We apply an independence weighting based on the spatial correlation of model errors and contrast the results with our original results (based on model distances).  $S_{ij}$  in equation (1) then becomes the matrix of model error correlation distances:

$$S_{ij} = 1 - CORR_{spatial}(m_i - obs, m_j - obs)$$

Figure R1 below shows the models “family tree” equivalent to figure 5 in the manuscript based on these correlation distances. While the grouping of models is mostly the same as in figure 5, there are also some obvious differences. The difference between the closest related models (e.g., UKESM1-0-LL and HadGEM3-GC31-LL) and the maximum distance between any two clusters of models is considerably larger. Several models have changed to a different cluster (e.g., NorESM2-MM or AWI-CM-1-1-MR). Without a detailed analysis, however, we can not make any clear statements on which clustering is “more correct”.

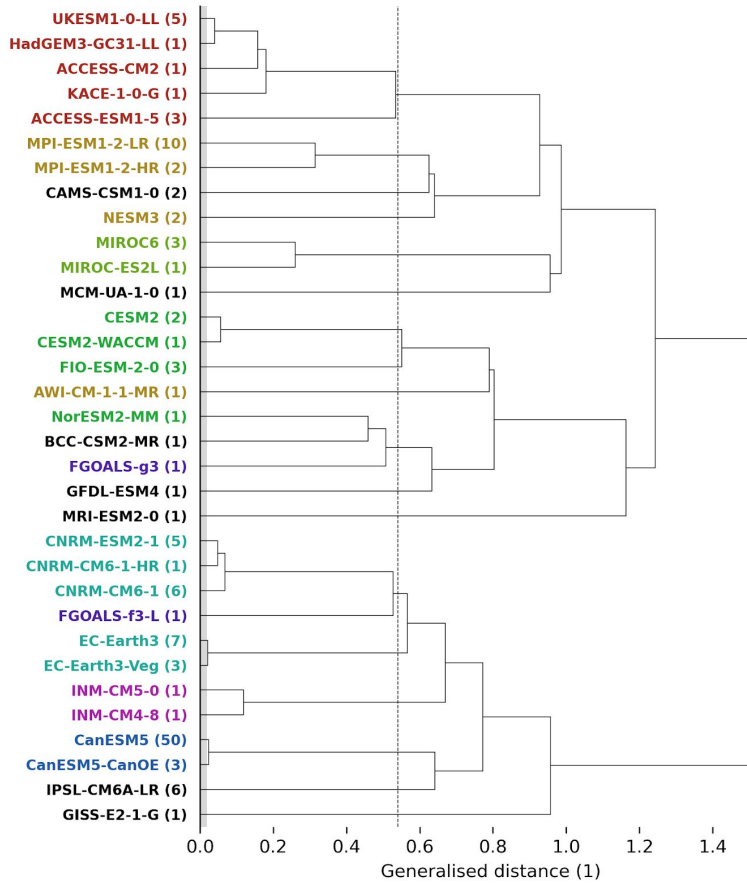

Figure R1: Similar to figure 5 in the revised manuscript but based on error correlation distances instead of model-model distances. Note that for this case we do not use any area weighting.

Based on the general similarity of the two trees, we do not expect the change in the independence metric to have a major influence on the results. In a second step we, therefore, look at the weighted distributions based on independence weights using these error correlation distances. The results are presented in figure R2 below. Compared to figure 8 in the revised manuscript there are only minimal differences. This at least shows that there are no strong disagreements between the approaches. One reason for the similarity is certainly also the fact that the weighting is dominated to a large degree by the performance weighting and, in particular, by the low weights of some of the strong warming models.

In summary we, therefore, argue that either approach might be appropriate to use, and the main conclusions in our manuscript are the same for an independence matrix based on correlation. For simplicity we, therefore, prefer to continue using our original metric basing independence directly on model-model distances which does not require observations and thus eliminates one potential source of uncertainty.

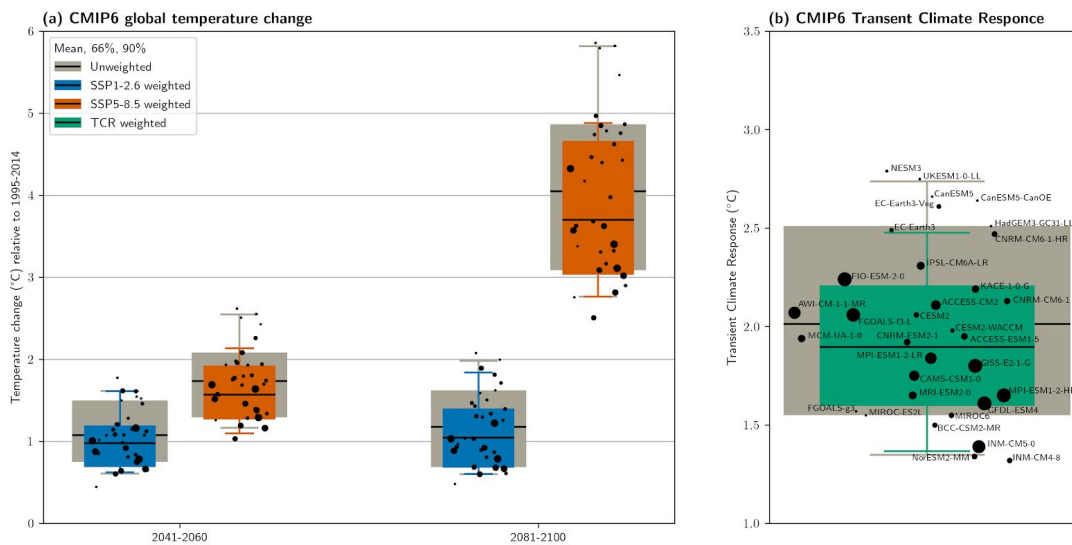

**Figure R2:** Similar to figure 8 in the revised manuscript but with the independence weighting based on error correlation distances instead of model-model distances. Note that for this case we do not use any area weighting in the independence weighting calculation.

### Specific comments

1. Line 16. Consider explaining what TCR is in the abstract to appeal to a broader audience.

**Indeed our study aims at a quite general audience and therefore focuses mainly on projections of future global warming which are widely known. In the revised manuscript we no longer mention TCR in the abstract.**

2. Line 31. Do you mean model uncertainty, unknown model climate error, unknown model-climate-sensitivity-to-CO2 error or model climate differences? We know what the model is, and we can determine its climate past, present and future by running it. We can also determine the differences between the climates of different models. Given the limitations of the spatio-temporal distribution of observations, the uncertain thing is the actual climate both past, present, and future, is it not?

**Model uncertainty here refers to the error of both present and future climate. In particular to its bias, since for climate projections we are concerned with correctly estimating distributions of trajectories, rather than individual trajectories like for weather and climate prediction.**

**“Model uncertainty” has become a standard piece of terminology in this subfield, following its popularization by Hawkins and Sutton (2009). It is also mentioned as “structural” uncertainty or error, referring to the structure of the model (which is assumed to be different between different climate models, hence the “model” label). We have updated the paragraph in question to make that more clear (lines 30-34 in the revised manuscript).**

3. Line 35. Lorenz, the father of chaos theory, argued that while the accuracy of weather forecasts was limited to a few weeks the climate of a system was not sensitive to specified initial conditions and could be known provided the forcing on the system was known. I guess “climate” in the sense of Lorenz refers to the statistical description of the attractor of the chaotic system. When you refer to

“internal variability” do you just mean slow modes of the model’s chaotic attractor that might possibly be confused with a change in the mean of the model’s attractor if the ensemble size was too small?

**“Internal variability” indeed refers to initial condition sensitivity; the terminology has become standard in the climate literature following papers like Hawkins and Sutton (2009) or Deser et al. (2012). Here “climate” refers to the statistical description of the attractor of the system which these models attempt to represent - including the atmosphere but also the ocean, ice, and land surface. Particularly for the ocean, coupled models and the real earth’s coupled system show variations on timescales of, at the very least, multiple years (e.g., due to ENSO) that depend on the initial conditions. Recently some efforts have sought to identify predictability on the order of decades, though if this exists it is assumed (here and generally) to be small.**

**Because GCMs are expensive to run and have unknown but expected long timescales before ensemble variance that properly samples the climatology is achieved, CMIP models are not at the point where many of them have enough ensemble members to adequately sample the attractor (in contrast to weather prediction, where that is currently achievable and in fact often achieved). With a small number of ensemble members and long timescales, internal variability is convolved with forced responses. These can be isolated with “large ensembles” (of several tens of simulations differing only by initial conditions) but the CMIP ensemble includes many models which are expected to differ in their bias, some of which also include multiple realizations from the same model, which are expected to differ among each other only in terms of their “internal variability” or due to sampling. We have added some discussion to the paragraph in question (lines 34-40 in the revised manuscript).**

**Deser, C., Phillips, A. S., Bourdette, V., & Teng, H. (2012). Uncertainty in climate change projections: the role of internal variability. *Climate Dynamics*, 38(3–4), 527–546. <https://doi.org/10.1007/s00382-010-0977-x>**

4. Line 102: I’m guessing you are referring to Section 3.2 of Brunner et al., 2019. Is that correct? If so, please state this in the text. Your wording suggested that you had estimated an observation error variance. However, on reading Section 3.2 of Brunner et al., 2019, I’m now guessing that you are referring to how your derived weights change depending on which subset of all observations you use. Are you suggesting that the reason for your weights changing is because the observations have different errors? Can you rule out the possibility that your weighting scheme isn’t just over-fitting each individual observational data set? In any case, the revised paper needs to clarify whether in fact you are referring to the size of the change in weights associated with using differing observational data sets. Also, the observed values are known. They are not uncertain. The errors of the observed values are unknown. It is the observational error that is uncertain.

**Thank you for pointing this out, the wording was unclear in the original manuscript. Indeed, it has been pointed out in the literature that using different observational datasets can lead to diverging results in some cases (e.g., Gleckler et al. 2008, Lorenz et al. 2018, Brunner et al. 2019) due to differences in the datasets. We referred to these differences in the observational datasets as observational uncertainty but no longer do so in the revised manuscript.**

**What we are concerned with here is bias in the observational datasets, which are a central challenge in climate science. In the presence of such biases, it is not unexpected that the results of the weighting change based on the datasets used. To get a reference that is as robust as possible, we are using a combination of two observational datasets (ERA5 and MERRA2) to calculate the model-observation distances and further the performance weights. The datasets are combined by taking the center of the observational spread at each grid cell (following Brunner et al. 2019 who also discuss other approaches; see their section 3.2 as well as section S2 and figure S3 in their supplement). We have clarified that and added additional information to the section in question in the revised manuscript (lines 103-110).**

Gleckler, P. J., Taylor, K. E., & Doutriaux, C. (2008). Performance metrics for climate models. *Journal of Geophysical Research Atmospheres*, 113(6), 1–20.  
<https://doi.org/10.1029/2007JD008972>

5. Line 145. “We want to...” If there was a hypothetical user of the climate projection that only cared about temperature trend and not about year-to-year variability, might you not be doing them a disservice by down-weighting members that have an excellent temperature trend but poor inter-annual variability? Consider changing to “We choose to...”

**The reviewer is correct in pointing out that the selection of diagnostics for establishing the models performance weights should depend on the target in question. In our study we look at temperature change in two time periods as a target, which is closely related to the temperature trend. Therefore, the temperature trend is indeed a powerful diagnostic.**

**However, it also is strongly influenced by internal variability (i.e., it differs quite strongly between initial-condition members of the same model) which is not desirable for a good diagnostic as we argue in line 171 of the revised manuscript: “Ideally, a performance weight is reflective of underlying model properties and does not depend on which ensemble member is chosen to represent that model (i.e., on internal variability). tasTREND does not fulfil this requirement: the spread within one model is the same order of magnitude as the spread among different models.”**

**We therefore use “a balanced combination of climate system features (i.e., diagnostics) relevant for the target to inform the weighting to minimise the risk for skill decreases. This guards against the possibility of a model “accidentally” fitting observations for a single diagnostic while being far away from them in several others (and hence possibly not providing a skilful projection of the target variable).” (line 454 of the revised manuscript)**

**In this sense we argue that even if a user is only interested in a model simulating future temperature trend correctly, it might still be important to also include other diagnostics. This can help to avoid weighting a model highly because it “accidentally” matches the observations in a given historical period due to, e.g., internal variability.**

6. Line 147-149. Equations should be added to precisely describe these observation derived quantities – perhaps in an appendix or supplementary material.

**We have now added a mathematical description of the diagnostic calculation to the supplement (section S2) and reference it in the revised manuscript in line 160.**

7. Line 170. You must state what was used as a proxy for a perfect model. I would think that the derived sigma\_D must be related to the ensemble variance of the model states around the time averaged state. That quantity will depend on the model will it not? Please clarify.

**We have adjusted our description of the shape parameter calculation in the revised manuscript in order to make this more clear. In the revised manuscript we now refer to the iterative test used to the performance shape parameter as parameter calibration (lines 182-191). In addition we have added additional information including a schematic of the calibration test to the supplement (section S3).**

8. Line 183. I looked at Section 2.3 of Brunner et al., 2019 for an explanation but Brunner et al. (2019) just directs the reader to Lorenz et al., 2018. Your work needs to be reproducible. When referring to another paper for a key explanation, you must give very specific information about where in the paper the explanation resides (e.g. a section number) to ensure reproducibility. You have not done this.

**The reviewer rightfully points out that we should have been more clear in referencing this important information. The calculation of the independence shape parameter and reasoning behind it is described in detail in the supplement of Brunner et al. (2019; section S3.1), which**

**we now explicitly mention. In addition we now provide a summary as well as a discussion of the chosen value in the context of our study in the supplement of the revised manuscript (see line 200 and supplement section S4 in the revised manuscript).**

9. Line 191. The method used to evaluate performance given here seems almost identical to that given in Abramowitz and Bishop (2015) but no reference is given to this paper or others that may have used this approach before. Such literature is relevant and should be cited.

**Thank you for pointing this out. We have added several references to the relevant literature which used similar approaches before (see line 206 in the revised manuscript).**

10. Line 200-205. Here, we learn that sigma\_D weights are determined in part from information from a place that is inaccessible in reality: the future. Only model futures are accessible. By line 205 we learn that the model future states (rather than observations) are, in fact, an integral part of choosing the weights. This is a significant departure from many other observation-based methods for improving ensemble forecasts and projections. The use of future time observations in the training causes all of the associated tests to be “in-sample” tests – dramatically reducing their trustworthiness. Since the CMIP5 models belong to the same general class of human produced climate simulators they can barely be considered “out-of-sample”. Please comment on the limitations of this approach. In addition, you have not clarified how the method of tuning for future states interacts with the method to determine sigma\_D referred to on line 170 (see previous comment).

**The reviewer rightfully points out that there is some influence from the future model states included in the weights via the performance parameter calibration. However, there also seems to be some misunderstanding regarding our approach. We adapted the sections in question to make it more clear in the revised manuscript.**

**The model performance weights are proportional to each model’s generalised distance (a combination of 5 diagnostics) to the observations ( $D_i$ ) as given in the numerator of equation (1). The proportionality constant is the performance shape parameter sigma\_D, which translates these distances into the weights. It is indeed established using the target period, i.e., the future model states. The weighting for the ensemble is then calibrated as a whole using this single parameter, and it is not the case that the weight of each model is calibrated individually through its historical simulation.**

**Crucially, this means that the weighting is still dominated by the comparison of models to the observations only. Consider, for example, a case where the diagnostics are really poorly chosen: this could be because they are dominated by (random) internal variability or because they do not have any physical relationship to the target. The weighting then would not have any skill, regardless of the sigma\_D parameter.**

**As, for example, Sanderson et al. (2017) state, selecting sigma\_D only based on historical information might lead to overconfident results as a more skillful representation of the base state does not necessarily translate to a more skillful representation of the future. Selecting sigma\_D only based on historical information would a priori assume that the chosen metric is relevant for the projection. One way of approaching the problem might be to apply the method on the historical and then test the result in a perfect model test, potentially adjusting the method in an iterative approach to maximise skill.**

**In our weighting approach we already include such a perfect model test in the calculation of the weights in order to avoid overconfident results. To avoid confusion between the setting of the parameter and the subsequent testing of method skill we have changed the terminology in our manuscript and refer to the former as *parameter calibration* to separate it from the later perfect model tests which are used to calculate the skill of the weighting. In addition we have added a section in the supplement detailing and visualising this parameter calibration (section S3 and figure S1 in the revised manuscript).**

Finally, addressing the question of the relationship between the calibration of the performance shape parameter and the subsequent testing of the skill of the method, we would argue that the circularity is quite limited. There are several reasons for this:

- As we point out above, the weighting is, to a large degree, based on the model's distance to historical observations, with future observations only influencing them via  $\sigma_D$ , which is a single value constant across all models, over time, and all metrics.
- The parameter calibration does not aim at maximising (mean) skill, but rather ensures that the results are not overconfident. Take the example of poorly chosen diagnostics again: in such a case, any separation into better or worse models would be overconfident as it would be based on pure chance. During the parameter calibration this would become obvious and  $\sigma_D$  would be relaxed to a large value (in order to avoid this overconfidence) leading to an approximation of equal weighting. Subsequently testing the skill of the method can still be insightful to estimate the actual increase in skill (or the lack thereof - in the case of badly chosen diagnostics).
- We use two different model pools to draw the perfect models from in our investigation of the method's skill. The first one is based on CMIP6 data, and one could therefore argue that it has a stronger potential circularity as the same models have been used to calibrate  $\sigma_D$ . However, this test is mainly used to investigate the relative differences between different combinations of diagnostics and to select the best performing one (see figure 1 and related discussion). Since any remaining circularity is the same for all cases shown in figure 1, a comparison between them should still be valid. We have adapted the abstract as well as section 3.1 to make that more clear.
- For the second test, we use CMIP5 models, which have not been used in the parameter calibration, as perfect models. Here, another potential issue arises: several CMIP6 models are related to CMIP5 models and are therefore not independent. However, about eight years of additional model development lie between the two generations. In addition, it has been noted that several CMIP6 models have a much higher climate sensitivity and are, hence, quite different from their predecessors (at least in their response to anthropogenic forcing, which dominates the future period used for the perfect model test).

To further increase the independence between the CMIP5 and CMIP6 ensembles, we now exclude directly-related models from the perfect model test in the revised manuscript. So, for example, when weighting based on the CMIP5 model HadGEM2-ES we exclude the CMIP6 models HadGEM3-GC31-LL and UKESM1-0-LL from the evaluation. A list of CMIP6 models excluded for each CMIP5 model can be found in table S5 in the supplement.

11. Line 266-280. Here we learn that the method is very prone to creating decreased skill relative to the multi-model unweighted mean. This negative result is in contrast to the positive results found in Abramowitz and Bishop (2015) using the method of Bishop and Abramowitz (2013).

Thank you for pointing this out, this was not expressed clearly in the original manuscript. In fact, the method produces a median skill increase of about 12-22% when using CMIP5 models as pseudo observations (see figure 3a in the revised manuscript). Nonetheless, it is correct that there can be a decrease in skill from the unweighted to the weighted multi-model ensemble based on our skill metric when using some CMIP5 models as pseudo-observations. However, these instances are limited to only a few (about 15% across SSPs and target periods) cases. We have revised the paragraph in question to make this more clear (line 314-322 in the revised manuscript).

We note that the change in skill also depends on the skill metric used and the target it is applied to. Here, our target is 20-year mean, global mean temperature change from 1995-2014 to two future periods (2041-60 and 2081-00). As a skill metric, we use the continuous ranked probability skill score (CRPSS), a measure for ensemble forecast quality. Note that this does



**not only evaluate the distance between the (un-) weighted mean and the reference but also considers the full distribution.**
